# Supplementary material for: Identification of Single Nucleotide Polymorphism in TaSBEIII and Development of KASP Marker Associated With Grain Weight in Wheat
Source: Frontiers journal article supplement (doi:10.3389/fgene.2021.697294), 2021-07-09
Supplement: Data_Sheet_1.PDF [file Data_Sheet_1.PDF]

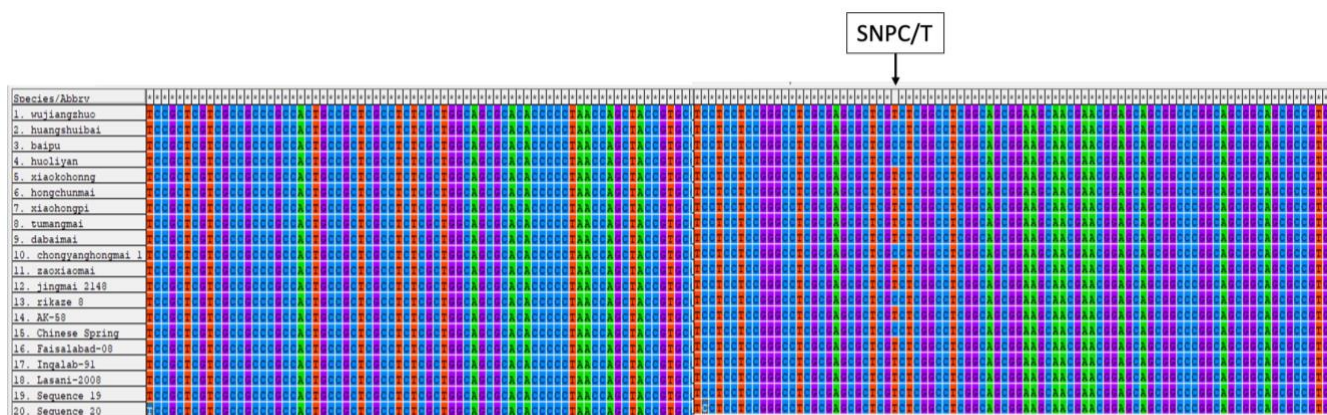

**FIGURE S1.** Alignment of twenty accession on MEGA software and identification of SNP.

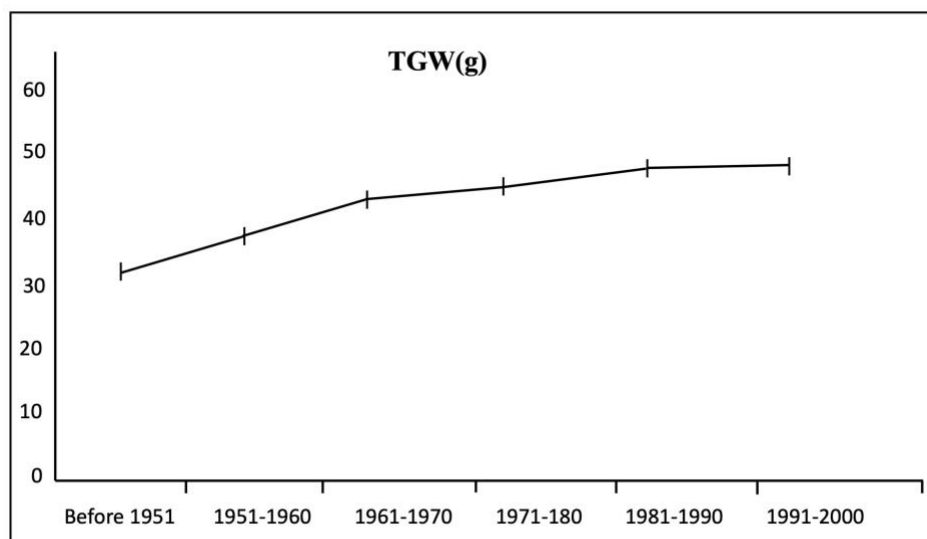

**FIGURE S2.** TGW changes from 1950 to 2000 in mini core collection of China. Error bars indicate the standard error.
